# Supplementary material
Source: MDPI journal article supplement (https://www.mdpi.com/2073-4395/12/12/3117)
Supplement: s1 [file s1]

Table S1. MFA Segregation of fruit mature abscission for F<sub>3</sub> families

| Population          | Total number | None-MFA | MFA | Exception ratio | $\chi^2$ Chi-square |
|---------------------|--------------|----------|-----|-----------------|---------------------|
| F <sub>3</sub> -83  | 150          | 114      | 36  | 3:1             | 0.46 <sup>a</sup>   |
| F <sub>3</sub> -57  | 142          | 102      | 40  | 3:1             | 0.33 <sup>b</sup>   |
| F <sub>3</sub> -42  | 130          | 61       | 59  | 3:1             | 15.51               |
| F <sub>3</sub> -97  | 128          | 81       | 37  | 3:1             | 1.11                |
| F <sub>3</sub> -109 | 122          | 121      | 1   | 3:1             | 32.07               |

$X^2_{(0.05,1)}=3.84$

a: F<sub>3</sub>-83 family was controlled by a single gene with *AL3*, it was used to mapped another candidate gene (Sheng et al., 2022)

b: F<sub>3</sub>-57 was another single gene segregation population

Table S2. Candidate gene qRT-PCR primer and Subcellular localization primer information

| Gene ID      | Forward sequence                               | Reverse sequence                                   | Enzyme     |
|--------------|------------------------------------------------|----------------------------------------------------|------------|
| MELO3C012405 | CTTGTTCTGGGCTCAGATGGA                          | GTCAACAGGTGGTGGACCTT                               |            |
| MELO3C012406 | GCTGAGCCGATGACGATTCT                           | TACAAAGCGACCACAGCACA                               |            |
| MELO3C012407 | CAACTTGCCAATGTGTCGCT                           | TATTTACTGCCGCTGGTGCT                               |            |
| MELO3C012408 | GACGTTGCCATGGTCGTAGA                           | TGGCTCTACATCGTGCTCCT                               |            |
| MELO3C012409 | ACTTTGATGTATGCGGGGGT                           | ATGCCAAGACCCACAAGCAA                               |            |
| MELO3C012410 | AGGCTATTGCAGATGCGGAG                           | GCTAATCCGGCTCGAACAAC                               |            |
| AB033599     | GGTGATGAAGCTCAGTCCAA                           | TGTAGAAGGTGTGATGCCAAA                              |            |
| CmARM14      | ATCCTCGAGCTGCAGGAGCTCATGGGTCCATCGGAGAAAGATATGG | CCCTTGCTCACCATCACTAGTCCTAGATTAGGTGATGGTCTATCAAAACG | SacI, SpeI |
| GFP-FCX      | TTGTGGCCGTTTACGTCGCC                           |                                                    |            |
| CmARM14R1    | CTCGAGATCACTAACTCATG                           |                                                    |            |
| CmARM14R2    | GACAATGGTTCTTTTGTTAC                           |                                                    |            |

Note: CmARM14 primer is the cloning primer. GFP-FCX, CmARM14R1 and CmARM14R2 are the sequencing primers.

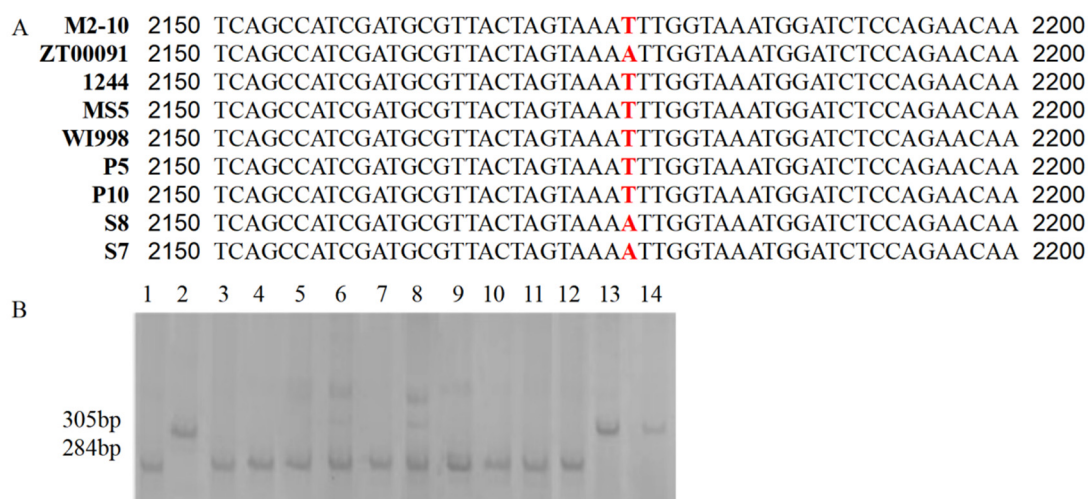

Figure S1 Natural population sequence analysis and electropherograms. A. Sequence analysis of the candidate gene *CmARM14* in different varieties (2150-2200 bp). In 7 natural populations, S8 and S7 are MFA varieties. The other varieties are None MFA. B. Electrophoretic maps of the markers screened for detection in 7 natural populations. No.1,3 and 4 are M2-10. No.2 is ZT00091. No.5-14 are 1244, MS5, WI998, P5, P10, S8 and S7.

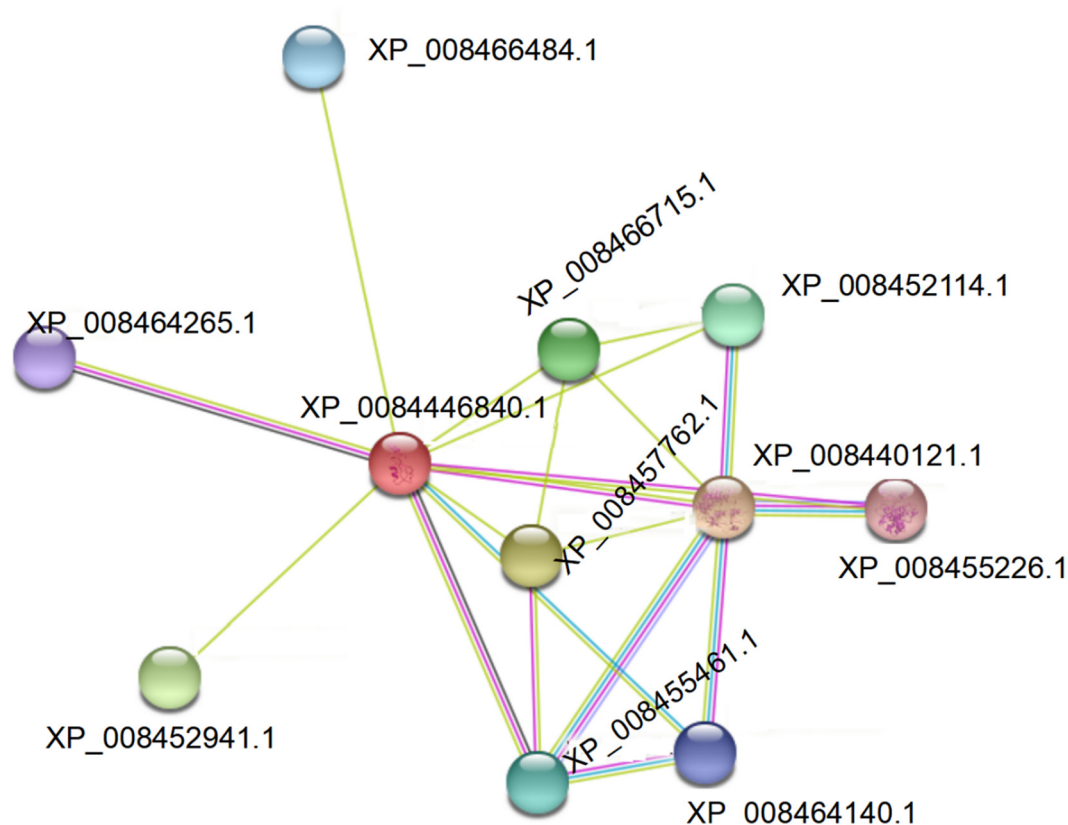

Figure S2. Prediction The interaction Protein with *CmARM14*. Using <https://cn.string-db.org/cgi> (accessed on 2 June 2022) web to predict interacted protein with *CmARM14*.
